# Supplementary material
Source: PubMed Central journal article supplement (PMC2877642)
Supplement: E10-01-0016_1.pdf [file E10-01-0016_1.pdf]

**Supplementary Table 1**

| <b>Organism</b>         | <b>Classification</b> | <b>Accession number</b> | <b>Abbreviation</b> |
|-------------------------|-----------------------|-------------------------|---------------------|
| Bos taurus              | Arf1                  | NP_788826               | BosArf1             |
| Bos taurus              | Arf2                  | NP_777114               | BosArf2             |
| Bos taurus              | Arf3                  | NP_001015571            | BostArf3            |
| Caenorhabditis elegans  | ArfI                  | NP_498235               | CeArfI              |
| Caenorhabditis elegans  | ArfII                 | NP_501336               | CeArfII             |
| Caenorhabditis elegans  | ArfIII                | NP_503011               | CeArfIII            |
| Canis lupus             | Arf1                  | XP_531820               | CIArf1              |
| Canis lupus             | Arf2                  | XP_537606               | CIArf2              |
| Canis lupus             | Arf3                  | XP_543688               | CIArf3              |
| Ciona Intestinalis      | ArfI-a                | XP_002119700            | Ci19700             |
| Ciona Intestinalis      | ArfI-b                | XP_002125592            | Ci25592             |
| Ciona Intestinalis      | ArfII                 | XP_002130554            | Ci30554             |
| Ciona Intestinalis      | ArfIII-a              | XP_002129954            | Ci29954             |
| Ciona Intestinalis      | ArfIII-b              | XP_002129929            | Ci29929             |
| Danio rerio             | ArfI-a                | NP_958888               | Dr8888              |
| Danio rerio             | ArfI-b                | NP_958860               | Dr8860              |
| Danio rerio             | ArfI-c                | AAH66632                | Dr6632              |
| Danio rerio             | ArfI-d                | NP_958912               | Dr8912              |
| Danio rerio             | Arf3-a                | NP_001012248            | Dr2248              |
| Danio rerio             | Arf3-b                | NP_001003441            | Dr3441              |
| Drosophila melanogaster | ArfI                  | NP_476955               | DmArf79F            |
| Drosophila melanogaster | ArfII                 | NP_524631               | DmArf102F           |
| Drosophila melanogaster | ArfIII                | NP_523751               | DmArf51F            |
| Gallus gallus           | Arf1                  | NP_001006352            | GgArf1              |
| Gallus gallus           | Arf4                  | XP_001232784            | GgArf4              |
| Gallus gallus           | Arf5                  | NP_990656               | GgArf5              |
| Gallus gallus           | Arf6                  | NP_001075174            | GgArf6              |
| Homo sapiens            | Arf1                  | NP_001649               | HsArf1              |
| Homo sapiens            | Arf3                  | NP_001650               | HsArf3              |
| Homo sapiens            | Arf4                  | NP_001651               | HsArf4              |
| Homo sapiens            | Arf5                  | NP_001653               | HsArf5              |
| Homo sapiens            | Arf6                  | NP_001654               | HsArf6              |
| Maccaca mulatta         | Arf1-a                | XP_001106772            | MmuArf1             |
| Maccaca mulatta         | Arf3                  | XP_001104727            | MmuArf3             |

|                                 |            |              |           |
|---------------------------------|------------|--------------|-----------|
| <i>Maccaca mulatta</i>          | Arf1-b     | XP_001105536 | MmuArf3x  |
| <i>Monosiga brevicolis</i>      | ArfI       | XP_001748945 | MonArfI   |
| <i>Monosiga brevicolis</i>      | ArfII      | XP_001749883 | MonArfII  |
| <i>Monosiga brevicolis</i>      | ArfIII     | XP_001743406 | MonArfIII |
| <i>Mus musculus</i>             | Arf1       | NP_031502    | MusmArf1  |
| <i>Mus musculus</i>             | Arf2       | NP_031503    | MusmArf2  |
| <i>Mus musculus</i>             | Arf3       | NP_031504    | MusmArf3  |
| <i>Mus musculus</i>             | Arf4       | NP_031505    | MusmArf4  |
| <i>Mus musculus</i>             | Arf5       | NP_031506    | MusmArf5  |
| <i>Mus musculus</i>             | Arf6       | NP_031507    | MusmArf6  |
| <i>Nematostella vectensis</i>   | ArfI/II-a  | XP_001634219 | Nem2285   |
| <i>Nematostella vectensis</i>   | ArfI/II-b  | XP_001640423 | Nem8733   |
| <i>Nematostella vectensis</i>   | ArfIII-a   | XP_001632921 | Nem6955   |
| <i>Nematostella vectensis</i>   | ArfI/II-c  | XP_001634746 | Nem6810   |
| <i>Nematostella vectensis</i>   | ArfI/II-d  | XP_001640422 | Nem8132   |
| <i>Nematostella vectensis</i>   | ArfI/II-e  | XP_001640455 | Nem8803   |
| <i>Nematostella vectensis</i>   | ArfI/II-f  | XP_001628436 | Nem1050   |
| <i>Nematostella vectensis</i>   | ArfIII-b   | XP_001632965 | Nem6872   |
| <i>Ornithorhynchus anatinus</i> | Arf3       | XP_001516517 | Orn16517  |
| <i>Ornithorhynchus anatinus</i> | Arf4       | XP_001511094 | Orn11094  |
| <i>Ornithorhynchus anatinus</i> | ArfIII-a   | XP_001514159 | Orn14159  |
| <i>Ornithorhynchus anatinus</i> | ArfIII-b   | XP_001512800 | Orn12800  |
| <i>Pan troglodytes</i>          | Arf1       | XP_513698    | PantArf1  |
| <i>Pan troglodytes</i>          | Arf3       | XP_509036    | PantArf3  |
| <i>Pan troglodytes</i>          | Arf4       | XP_001173782 | PantArf4  |
| <i>Pan troglodytes</i>          | Arf6       | XP_509935    | PantArf6  |
| <i>Ratus norvegicus</i>         | Arf1       | NP_071963    | RnArf1    |
| <i>Ratus norvegicus</i>         | Arf2       | NP_077064    | RnArf2    |
| <i>Ratus norvegicus</i>         | Arf3       | NP_543180    | RnArf3    |
| <i>Saccharomyces cerevisiae</i> | Arf I/II-1 | NP_010089    | ScArf 1   |
| <i>Saccharomyces cerevisiae</i> | ArfI/II-2  | NP_010144    | ScArf 2   |
| <i>Saccharomyces cerevisiae</i> | ArfIII     | NP_014737    | ScArf3    |
| <i>Salmo salar</i>              | ArfI-a     | ACI33932     | SsArf1    |
| <i>Salmo salar</i>              | ArfI-b     | ACH70742     | SsArf2    |
| <i>Salmo salar</i>              | Arf3       | NP_001133306 | SsArf3    |
| <i>Salmo salar</i>              | ArfII-a    | ACI33187     | SsArf4    |
| <i>Salmo salar</i>              | ArfII-b    | ACM09449     | SsArf4b   |
| <i>Salmo salar</i>              | Arf6       | ACI33167     | SsArf6    |

|                               |            |              |           |
|-------------------------------|------------|--------------|-----------|
| Schizosaccharomyces pombe     | ArfI/II-1  | NP_596118    | Sp596118  |
| Schizosaccharomyces pombe     | ArfI/II-2  | NP_596822    | Sp596822  |
| Schizosaccharomyces pombe     | ArfIII     | NP_593036    | Sp593036  |
| Strongylocentrotus purpuratus | Arf I/II-a | XP_791037    | Str91037  |
| Strongylocentrotus purpuratus | Arf I/II-b | XP_783520    | Str83520  |
| Strongylocentrotus purpuratus | Arf I/II-c | XP_787374    | Str87374  |
| Strongylocentrotus purpuratus | ArfIII-a   | XP_001191776 | Str191776 |
| Strongylocentrotus purpuratus | ArfIII-b   | XP_796400    | Str96400  |
| Taeniopygia guttata           | Arf1       | XP_002194825 | Tae4825   |
| Taeniopygia guttata           | Arf4       | XP_002193649 | Tae3649   |
| Taeniopygia guttata           | Arf6       | XP_002200661 | Tae0061   |
| Trichoplax adhaerens          | ArfI       | XP_002110783 | Tric63238 |
| Trichoplax adhaerens          | ArfII      | XP_002108209 | Tric19616 |
| Trichoplax adhaerens          | ArfIII     | XP_002107960 | Tric49674 |
| Xenopus laevis                | ArfI       | NP_001080474 | XIArf1    |
| Xenopus laevis                | Arf3       | NP_001086694 | XIArf3    |
| Xenopus laevis                | ArfII      | NP_001082540 | XIArf4    |
| Xenopus laevis                | Arf6       | NP_001086677 | XIArf6    |

**Information for sequences used in phylogenetic analyses.**

Information for all sequences used in all phylogenetic analyses (including the initial analyses not shown) is provided by organism name, our assessment of the classification of Arf homology, accession number and abbreviation used in the dataset used for analysis.

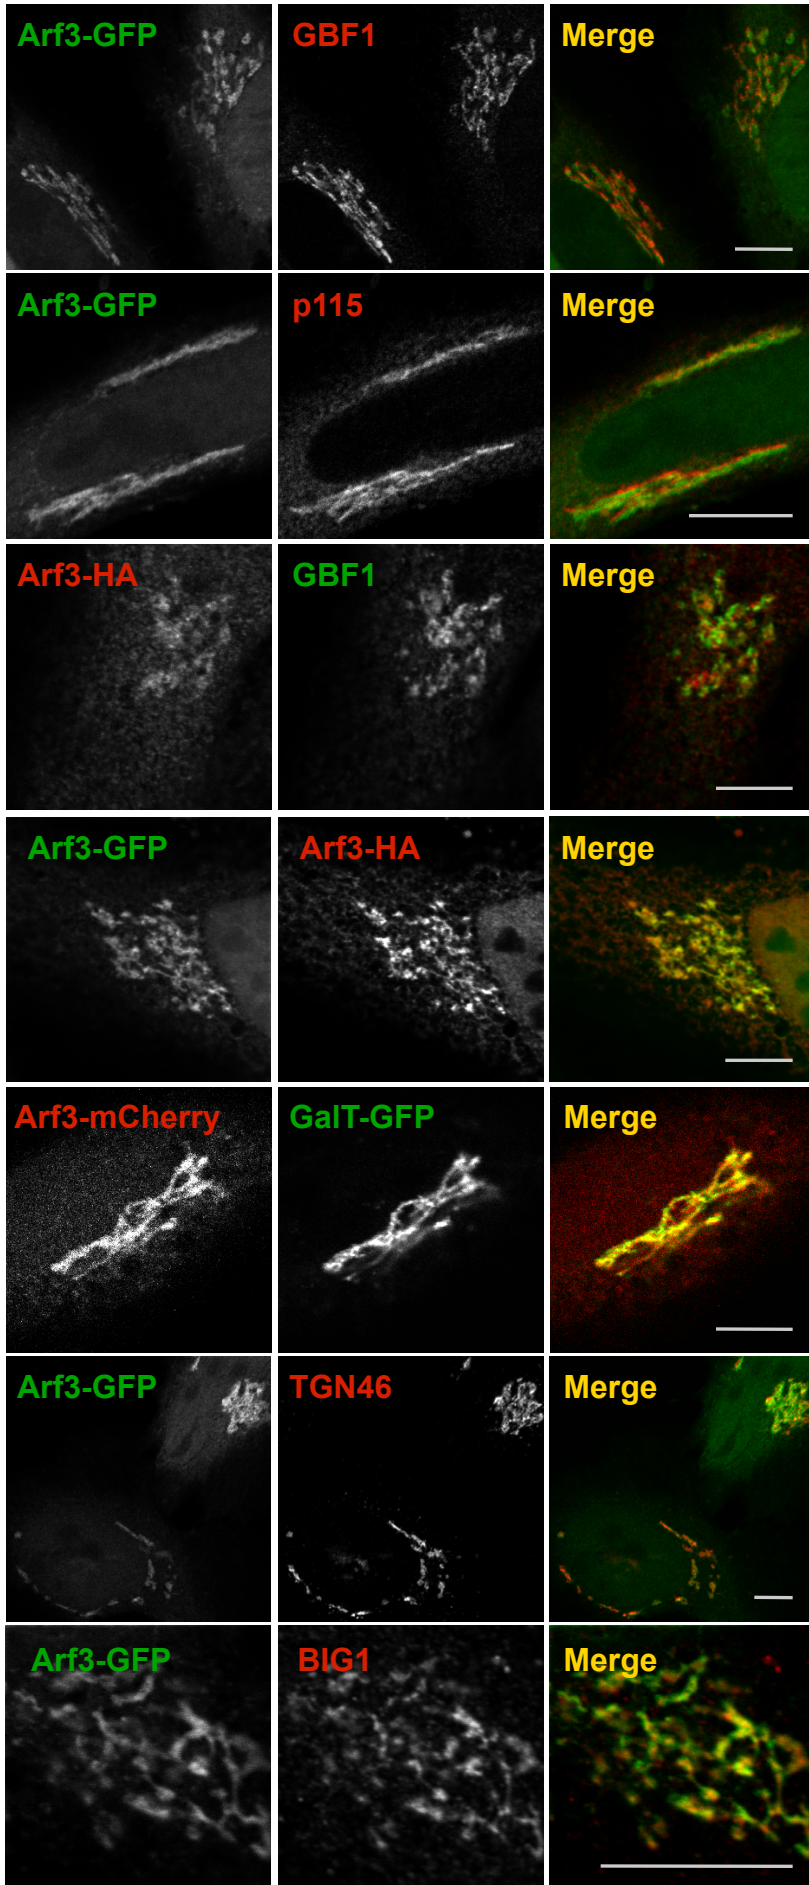

**Supplementary Figure 1. Arf3 also localizes to the *trans*-side of the Golgi complex in HeLa cells, regardless of the tag.**

HeLa cells were transfected with plasmids encoding Arf3-GFP, Arf3-mCherry, Arf3-HA and/or GaIT-GFP as indicated. Fixed cells were stained for the specified markers and images were acquired using a confocal microscope. Representative images selected from at least 3 separate experiments are shown. Although red and green signal vary in intensity, individual channels reveal different (first 3 set of panels) or similar (last 4 set of panels) patterns. Bar, 10 $\mu$ m.

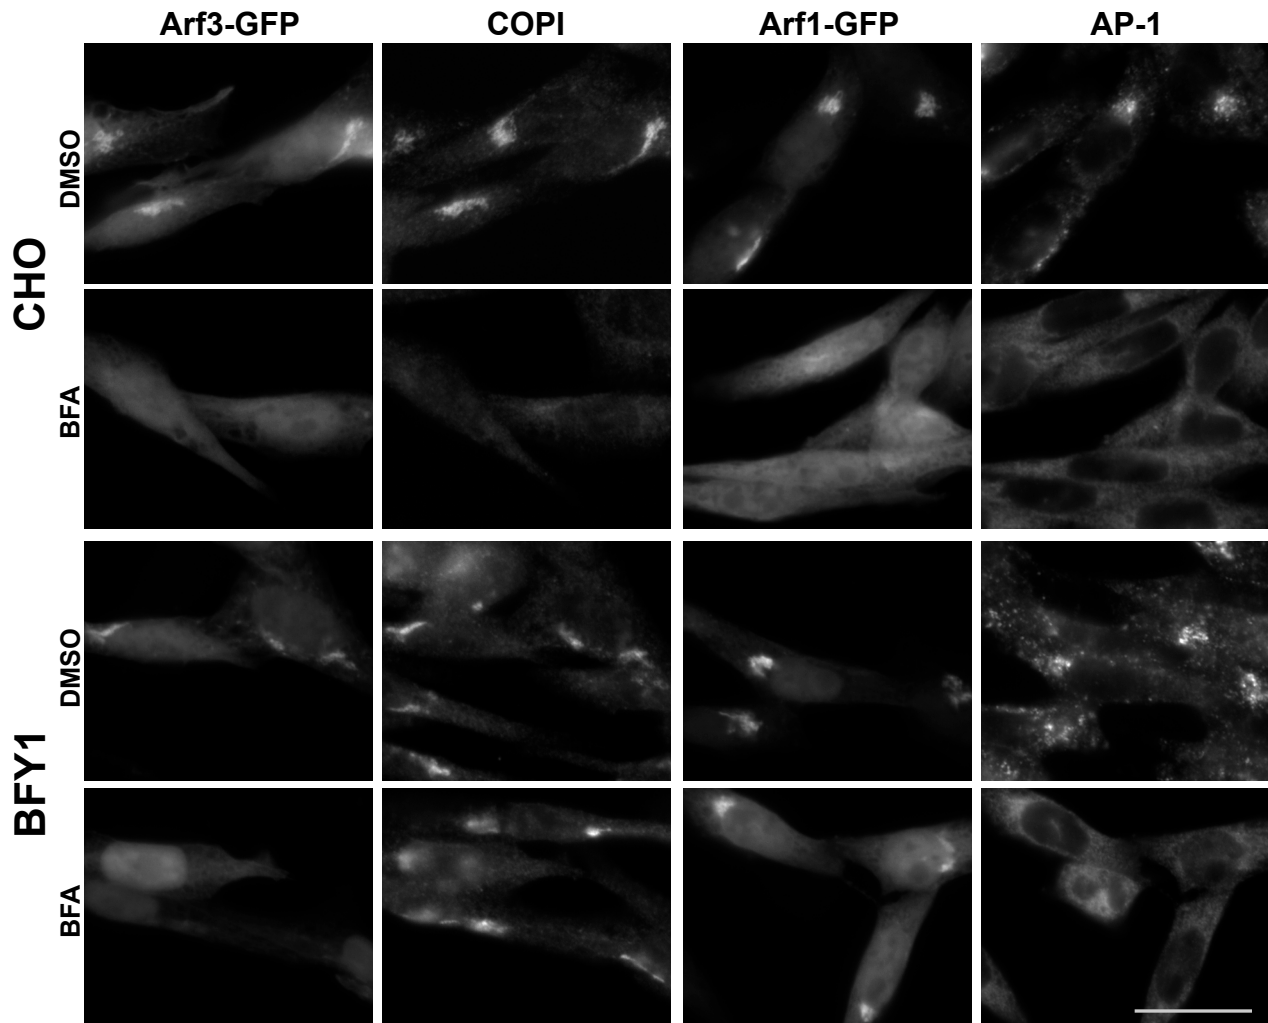

**Supplementary Figure 2. Membrane recruitment of Arf3 remains BFA sensitive in BFY1 cells.**

CHO and BFY1 cells were transfected with a plasmid encoding Arf3-GFP or Arf1-GFP. After 24 hours, cells were treated with 5 $\mu$ g/ml BFA for 2 min and then fixed and stained for COPI or AP-1. Representative epifluorescence images are shown selected from at least 2 separate experiments. Bar, 20 $\mu$ m.

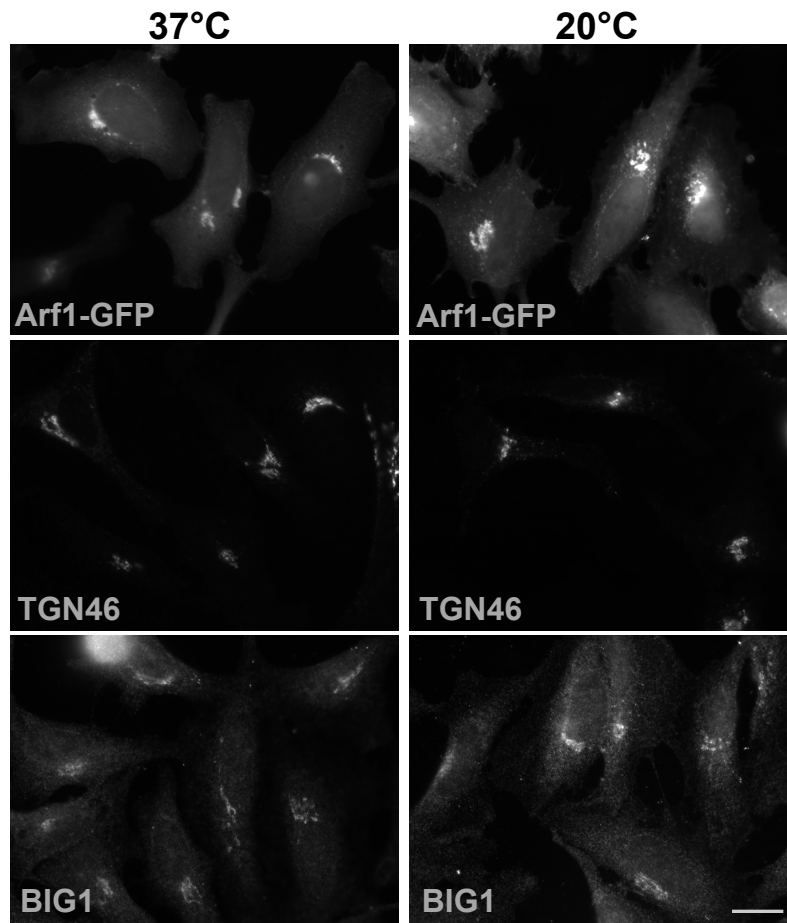

**Supplementary Figure 3. Temperature shift to 20°C has no impact on Golgi membrane localization of Arf1-GFP, TGN46 or BIG1.**

HeLa cells were transfected with a plasmid encoding Arf1-GFP or transfection reagent only for 24 hours. Cells were either fixed directly from 37°C (left panels) or shifted from 37°C to 20°C for 2 hours and then fixed. Cells were stained for the specified markers and images were acquired using identical settings for the 37°C and the 20°C samples. Representative epifluorescence images selected from at least 2 separate experiments are shown. Bar, 20µm.

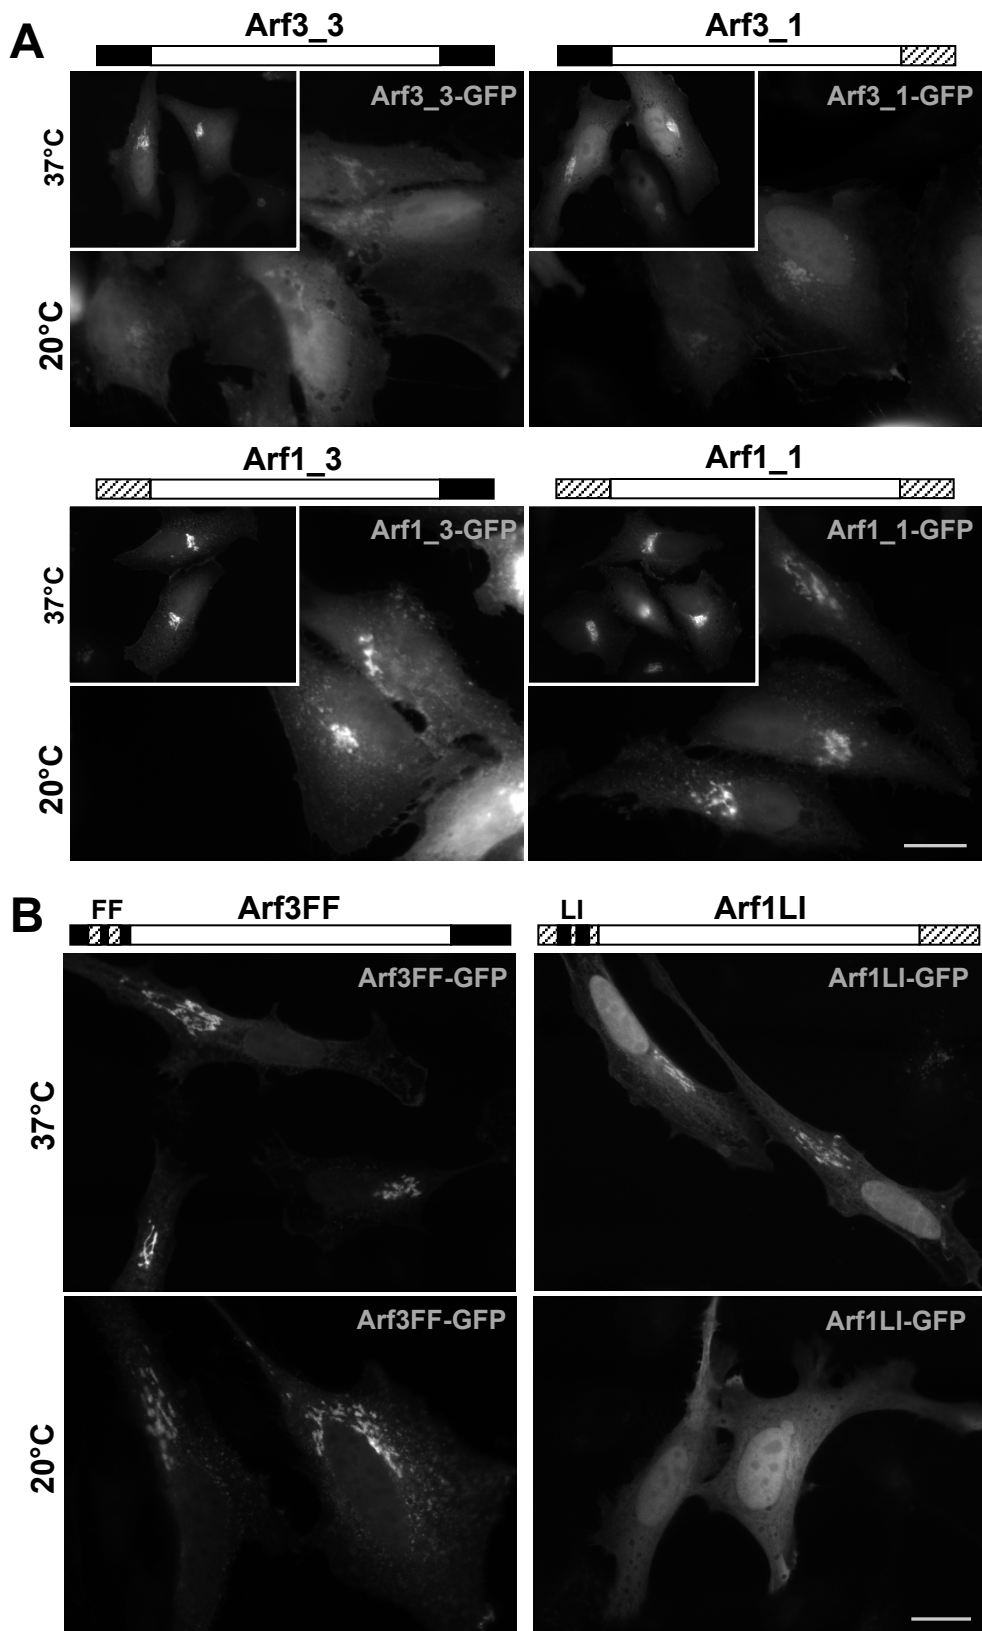

**Supplementary Figure 4. Two residues in the N-terminal helix dictate the temperature sensitivity for membrane recruitment of Arf3 and Arf1.**

HeLa cells were transfected with Arf3/Arf1 chimeras (A) or double mutants (B) tagged with GFP, as indicated. After 24 hours, cells were either kept 37°C or shifted to 20°C for 30 minutes and then fixed. Epifluorescence images are shown. Schematic representation of chimeras shown above each panel. Bar, 20µm.

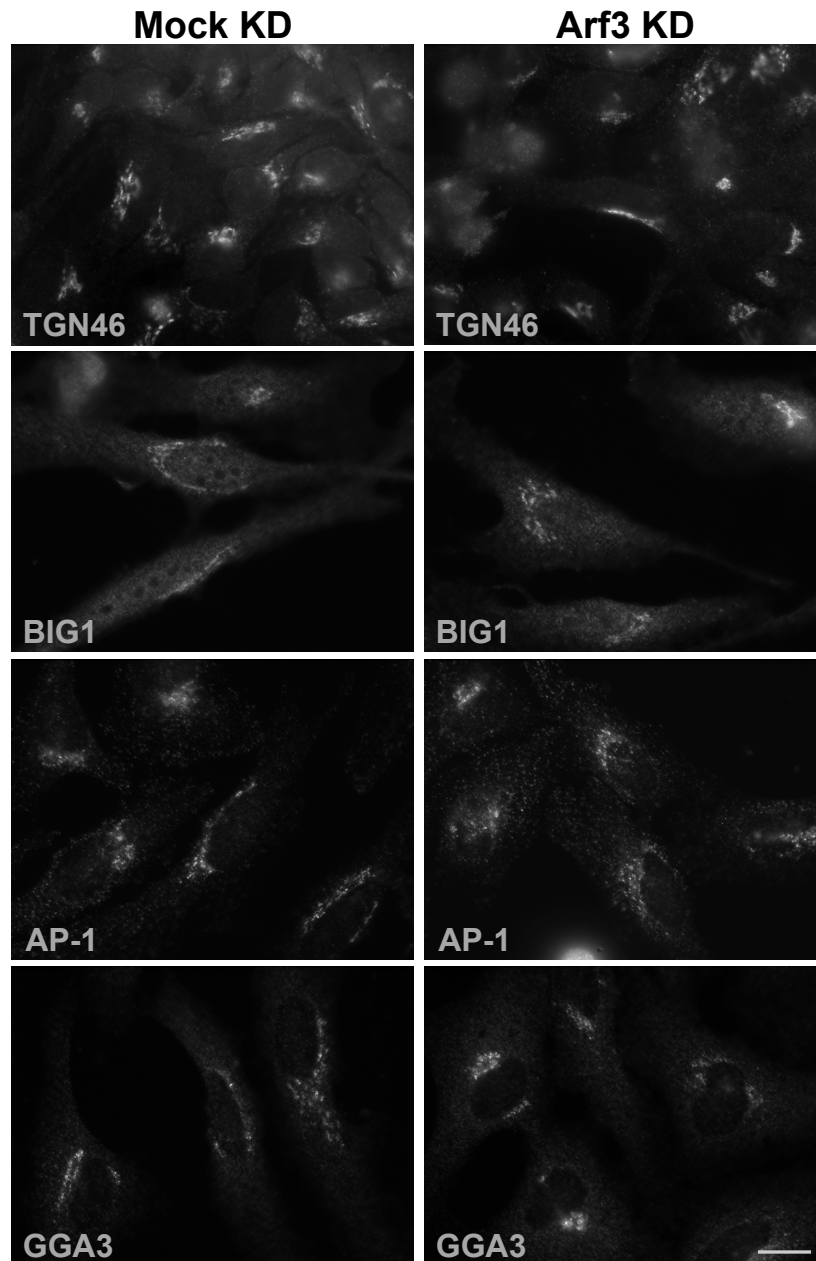

**Supplementary Figure 5. Arf3 knockdown has no effect on either TGN structure or membrane recruitment of clathrin adaptors AP1 and GGA3.**

HeLa cells were transfected with either irrelevant siRNA (Mock KD, left panels) or a pool of two validated Arf3 siRNA duplexes (Arf3 KD, right panels). 72 hours post transfection cells were fixed and stained for the specified markers. Representative epifluorescence images selected from at least 2 separate experiments are shown. Bar, 20 $\mu$ m.



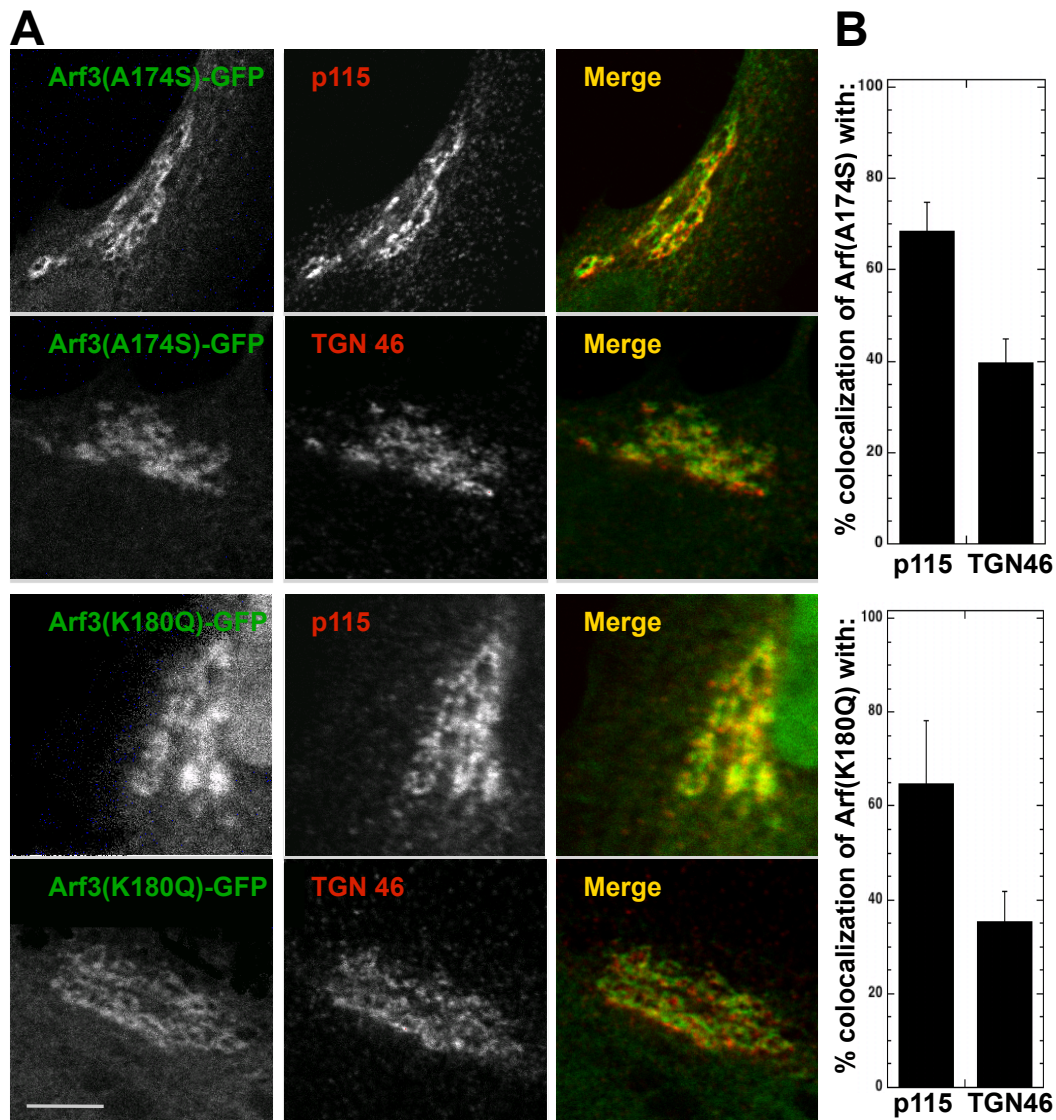

**Supplementary Figure 6. Two residues in the C-terminal helix of Arf3 are required for concentration on the TGN in HeLa cells.**

**A.** HeLa cells were transfected with the indicated Arf3A174S-GFP, Arf3K174R-GFP, Arf3A174S-GFP or Arf3K180Q-GFP chimeras. After 24 hours, cells were fixed and stained for p115 or TGN46. Images were acquired using a confocal microscope. Bar, 5 $\mu$ m. **B.** Quantitative analysis of experiments similar to **A** showing signal overlap between the Arf3/Arf1 swap single mutants and the specified markers. Error bars correspond to the mean  $\pm$  SD (n  $\geq$  10 cells from 2 separate experiments).
